# Supplementary material
Source: PubMed Central journal article supplement (PMC4284551)
Supplement: pnas.1410931111.sapp.pdf [file pnas.1410931111.sapp.pdf]

# Supplementary Information Appendix for *Links that speak: The global language network and its association with global fame*

Shahar Ronen, Bruno Gonçalves, Kevin Z. Hu, Alessandro Vespignani,  
Steven Pinker, César A. Hidalgo

Supplementary online material (SOM) and additional  
visualizations are available on <http://language.media.mit.edu>

## Table of Contents

|                                                                                        |           |
|----------------------------------------------------------------------------------------|-----------|
| <b>S1 Data</b> .....                                                                   | <b>2</b>  |
| S1.1 Twitter .....                                                                     | 2         |
| S1.2 Wikipedia .....                                                                   | 4         |
| S1.3 Book translations .....                                                           | 7         |
| <b>S2 Language notation and demographics</b> .....                                     | <b>8</b>  |
| S2.1 Notation.....                                                                     | 8         |
| S2.2 Population .....                                                                  | 9         |
| S2.3 Language GDP .....                                                                | 10        |
| <b>S3 Additional calculations</b> .....                                                | <b>11</b> |
| <b>S4 Language centrality: Eigenvector centrality vs. betweenness centrality</b> ..... | <b>12</b> |
| <b>S5 Famous people per language</b> .....                                             | <b>14</b> |
| S5.1 Associating a famous person with languages .....                                  | 14        |
| S5.2 Wikipedia .....                                                                   | 18        |
| S5.3 Human Accomplishment .....                                                        | 22        |
| S5.4 Comparison of the famous people datasets .....                                    | 24        |
| <b>References for the SI Appendix</b> .....                                            | <b>26</b> |

## S1 Data

### S1.1 Twitter

Twitter is a microblogging and online social networking service where users communicate using text messages of up to 140 characters long called *tweets*. As of December 2012, Twitter had over 500 million registered users from all over the world, tweeting in many different languages. Of these, 200 million users were active every month (1).

Tweets are attributed to their authors and can be used to identify polyglots and the language communities they connect, making Twitter a good source for representing the GLN of tens of millions of people. Registered Twitter accounts make up for 7% of world population, but its demographics may not reflect real-life demographics (2). For example, Twitter users in the United States are younger and hold more liberal opinions than the general public (3).

We collected 1,009,054,492 tweets between December 6, 2011 and February 13, 2012, through the Twitter *garden hose*, which gives access to 10% of all tweets. We detected the language of each tweet using the Chromium Compact Language Detector (CLD) (4), which was chosen for its wide language support and its relatively accurate detection of short messages (5, 6). However, any automated language detection is prone to errors (7), all the more so when performed on short, informal texts such as tweets. To reduce the effect of such errors, we applied the following methods.

Firstly, to improve detection, we removed *hashtags* (marks of keywords or topics, which start with a #), URLs, and *@-mentions* (references to usernames, which start with a @). Hashtags, URLs and *@-mentions* are often written in English or in another Latin script, regardless of the actual language of the tweet, and may mislead the detector.

Secondly, we used only tweets that CLD detected with a high degree of confidence. CLD suggests up to three possible languages for the text detected, and gives each option a score that indicates its certainty of the identification, 1 being the lowest and 100 being the highest. If the top option has a much higher score than the other options, CLD marks the identification as *reliable*. We only used tweets that CLD was able to detect with a certainty

over 90% and indicated a reliable detection. The 90% threshold was chosen as the optimal tradeoff between detection accuracy and number of tweets detected, based on a sample of 1 million tweets (see Figure S1A).

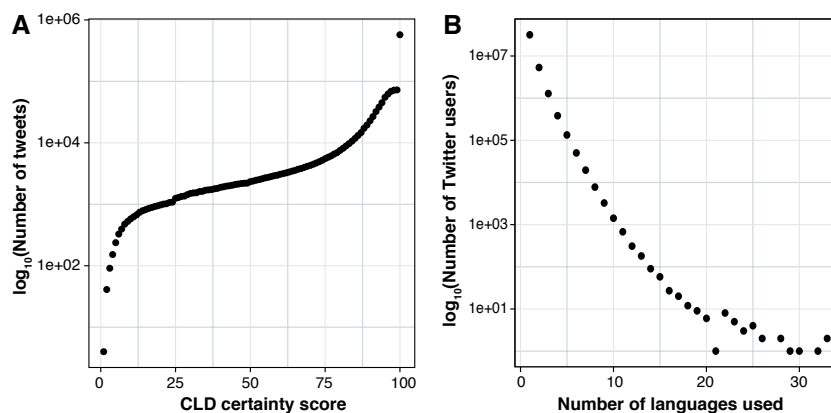

**Figure S1** **A** number of tweets as function of certainty **B** Distribution of Twitter users by number of languages in which they tweet.

Thirdly, as mutually intelligible languages are difficult to distinguish, we merged similar languages. To do so, we converted the two-letter ISO 639-1 language codes (8) produced by CLD to three-letter ISO 639-3 codes (9), and merged them using the ISO 639-3 macrolanguages standard. See **Section S2.1** for further details and limitations.

Finally, to reduce the effect of individual detection errors, we considered for each user only languages in which he or she tweeted at least twice, and considered only users who made at least five tweets overall. We found that a large number of users tweeted in a relatively large number of languages, and we attribute some of this to inaccurate language detection. To prevent this from skewing the representation of the Twitter GLN, we discarded users who tweeted in more than five languages (Figure S1B). Five was chosen as the cutoff based on the impression of linguist Richard Hudson that five languages were the most spoken in a community; he coined the term *hyper-polyglots* for people who speak six languages or more (10). Some of these users might be bots, which are common on Twitter. Note however that multilingual Twitter bots are not considered a common phenomenon, and even if they were, a bot reading news in one language and re-tweeting them in another is certainly an indication of interaction between the two languages.

After applying the criteria listed above, we had a dataset of 548,285,896 tweets in 73 languages by 17,694,811 users, which is available on the SOM site. We used this dataset to

generate the Wikipedia GLN shown in Figure 1 of the main section. **Table S1** shows statistics for the languages with the most tweets in our Twitter dataset.

| #  | Language            | Code | Tweets      | Users      | Tweets per user | % of total users |
|----|---------------------|------|-------------|------------|-----------------|------------------|
| 1  | <b>English</b>      | eng  | 255,351,176 | 10,859,465 | 23.5            | 61.37%           |
| 2  | <b>Japanese</b>     | jpn  | 91,669,691  | 2,602,426  | 35.2            | 14.71%           |
| 3  | <b>Malay</b>        | msa  | 49,546,710  | 1,651,705  | 30              | 9.33%            |
| 4  | <b>Portuguese</b>   | por  | 46,520,572  | 1,617,409  | 28.8            | 9.14%            |
| 5  | <b>Spanish</b>      | spa  | 44,195,979  | 2,043,468  | 21.6            | 11.55%           |
| 6  | <b>Korean</b>       | kor  | 11,674,755  | 289,982    | 40.3            | 1.64%            |
| 7  | <b>Dutch</b>        | nld  | 10,526,980  | 435,128    | 24.2            | 2.46%            |
| 8  | <b>Arabic</b>       | ara  | 9,993,172   | 366,643    | 27.3            | 2.07%            |
| 9  | <b>Thai</b>         | tha  | 7,449,790   | 154,171    | 48.3            | 0.87%            |
| 10 | <b>Turkish</b>      | tur  | 4,660,694   | 233,158    | 20              | 1.32%            |
| 11 | <b>Russian</b>      | rus  | 4,577,942   | 243,159    | 18.8            | 1.37%            |
| 12 | <b>French</b>       | fra  | 3,434,065   | 147,843    | 23.2            | 0.84%            |
| 13 | <b>Filipino</b>     | fil  | 1,905,619   | 257,611    | 7.4             | 1.46%            |
| 14 | <b>German</b>       | deu  | 1,705,256   | 73,897     | 23.1            | 0.42%            |
| 15 | <b>Italian</b>      | ita  | 1,586,225   | 89,242     | 17.8            | 0.50%            |
| 16 | <b>Swedish</b>      | swe  | 596,130     | 36,604     | 16.3            | 0.21%            |
| 17 | <b>Modern Greek</b> | ell  | 526,527     | 30,609     | 17.2            | 0.17%            |
| 18 | <b>Chinese</b>      | zho  | 453,837     | 24,113     | 18.8            | 0.14%            |
| 19 | <b>Catalan</b>      | cat  | 236,424     | 32,376     | 7.3             | 0.18%            |
| 20 | <b>Norwegian</b>    | nor  | 170,430     | 16,500     | 10.3            | 0.09%            |

**Table S1** Statistics for the twenty languages with the most tweets in our Twitter dataset. The full table is available on the SOM.

### **S1.2 Wikipedia**

Wikipedia is a multilingual, web-based, collaboratively edited encyclopedia. As of March 2013, Wikipedia had 40 million registered user accounts across all language editions, of which over 300,000 actively contributed on a monthly basis (11). Wikipedia’s single sign-on mechanism lets editors use the same username on all language editions to which they contribute. This allows us to associate a contribution with a specific person and identify the languages spoken by that person.

We compiled our Wikipedia dataset as follows. Firstly, we collected information on editors and their contributions in different languages from the edit logs of all Wikipedia editions until the end of 2011. We collected only edits to proper articles (as opposed to user pages or talk pages), and only edits made by human editors. Edits by bots used by Wikipedia for basic maintenance tasks (e.g., fixing broken links, spellchecking, adding references to other pages) were ignored, as many of them make changes in an unrealistic

number of languages, potentially skewing the GLN. This initial dataset contained 643,435,467 edits in 266 languages by 7,344,390 editors.

Secondly, we merged the languages as we did for the Twitter dataset, discarding ten Wikipedia editions in the process. Two of them are more or less duplicates of other editions, namely *simple* (Simple English) of English and *be-x-old* (Classic Belarusian) of Official Belarusian. The remaining eight could not be mapped to standard ISO639-3 languages: *bh*, *cbk\_zam*, *hz*, *map\_bms*, *nah*, *nds\_nl*, *tokipona*, *roa\_tara*. These eight editions are small and contain together 220,575 edits by 318 contributors.

Finally, to reduce the effect of one-time edits, which may be cosmetic or technical and may not indicate knowledge of a language, we set the same thresholds as for our Twitter dataset. For each user we considered only languages in which he or she made at least two edits, and considered only users who made at least five edits overall. We also discarded editors who contributed to more than five languages, following the rationale explained in the Twitter section. We did so because a large number of users contributed to an unrealistic number of languages: hundreds of users contributed to over 50 language editions each, and dozens edited in over 250 languages each (see Figure S2). For example, one of the users we identified was a self-reported native speaker of Finnish (contributed 6,787 edits to this edition by the end of 2011), and an intermediate speaker of English (834 edits) and Swedish (20 edits). However, this user contributed to ten additional language editions, in particular Somali (149 edits) and Japanese (58 edits). Most of these contributions are maintenance work that does not require knowledge of the language, such as the addition of a redirection or the reversion of changes.

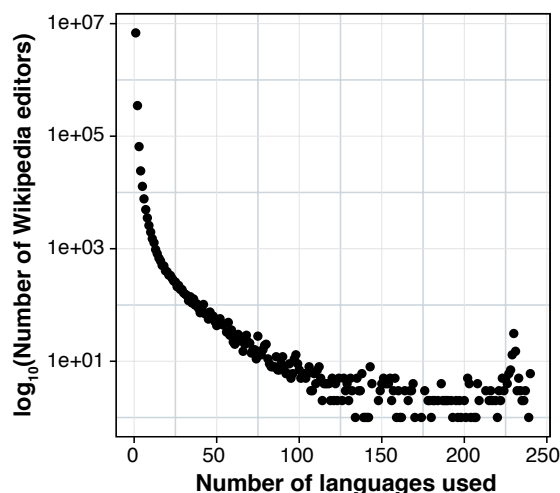

**Figure S2** Distribution of Wikipedia editors by number of languages in which they contribute.

Table S2 below shows statistics for the languages with the most edits in our dataset. The final dataset consists of 382,884,184 edits in 238 languages by 2,562,860 contributors, and is available on the SOM site. We used this dataset to generate the Wikipedia GLN shown in Figure 1 of the main section.

| #  | Language              | Code | Edits       | Editors   | Edits per user | % of total editors |
|----|-----------------------|------|-------------|-----------|----------------|--------------------|
| 1  | <b>English</b>        | eng  | 198,361,048 | 1,589,250 | 124.81         | 62.011%            |
| 2  | <b>German</b>         | deu  | 33,977,378  | 224,215   | 151.54         | 8.749%             |
| 3  | <b>French</b>         | fra  | 23,070,757  | 142,795   | 161.57         | 5.572%             |
| 4  | <b>Japanese</b>       | jpn  | 16,149,315  | 102,857   | 157.01         | 4.013%             |
| 5  | <b>Spanish</b>        | spa  | 13,645,596  | 145,487   | 93.79          | 5.677%             |
| 6  | <b>Russian</b>        | rus  | 12,445,887  | 81,925    | 151.92         | 3.197%             |
| 7  | <b>Italian</b>        | ita  | 11,923,658  | 72,981    | 163.38         | 2.848%             |
| 8  | <b>Chinese</b>        | zho  | 7,302,770   | 50,341    | 145.07         | 1.964%             |
| 9  | <b>Polish</b>         | pol  | 6,589,015   | 47,015    | 140.15         | 1.834%             |
| 10 | <b>Dutch</b>          | nld  | 6,393,791   | 46,951    | 136.18         | 1.832%             |
| 11 | <b>Hebrew</b>         | heb  | 5,467,149   | 18,998    | 287.77         | 0.741%             |
| 12 | <b>Portuguese</b>     | por  | 5,168,734   | 60,487    | 85.45          | 2.360%             |
| 13 | <b>Swedish</b>        | swe  | 3,521,224   | 30,498    | 115.46         | 1.190%             |
| 14 | <b>Finnish</b>        | fin  | 2,926,115   | 20,811    | 140.60         | 0.812%             |
| 15 | <b>Hungarian</b>      | hun  | 2,713,725   | 18,033    | 150.49         | 0.704%             |
| 16 | <b>Korean</b>         | kor  | 2,634,092   | 16,464    | 159.99         | 0.642%             |
| 17 | <b>Arabic</b>         | ara  | 2,178,719   | 18,258    | 119.33         | 0.712%             |
| 18 | <b>Turkish</b>        | tur  | 2,062,037   | 23,926    | 86.18          | 0.934%             |
| 19 | <b>Serbo-Croatian</b> | hbs  | 2,030,039   | 10,901    | 186.23         | 0.425%             |
| 20 | <b>Ukrainian</b>      | ukr  | 1,839,988   | 10,028    | 183.49         | 0.391%             |

**Table S2** Statistics for the twenty languages with the most edits in our Wikipedia dataset. The full table is available on the SOM site.

### S1.3 Book translations

The Index Translationum is an international bibliography of book translations maintained by UNESCO (12). The online database contains information on books translated and published in print in about 150 countries since 1979. Some countries are missing data for certain years, such as the United Kingdom in the years 1995-2000 and 2009-2011 (13).

We retrieved a dump of the data on July 22, 2012, which contained 2,244,527 translations in 1,160 languages. After removing a few corrupt entries, we converted the language codes listed in the Index Translationum to standard three-letter ISO639-3 codes. The following entries were discarded from the dataset: 41 miscellaneous dialects of languages that were already listed (together accounting for under 100 translations total), 46 languages that could not be mapped to standard ISO639-3 codes (together accounting for about a thousand translations total), and 5 administrative codes (*mis*, *mul*, *und*, *zxx*, and *not supplied*; see ISO639-3 documentation (9)). The remaining languages were merged into macrolanguages (see **Section S2.1**).

Table S3 shows statistics for the languages with the most translations in our dataset. The final dataset contains 2,231,920 translations in 1,019 languages. We used this dataset to generate the book translations GLN shown in Figure 1 of the main section.

| #  | Language             | Code | Translations from | Translations to | Total translations |
|----|----------------------|------|-------------------|-----------------|--------------------|
| 1  | English              | eng  | 1,225,237         | 146,294         | 1,371,531          |
| 2  | German               | deu  | 201,718           | 292,124         | 493,842            |
| 3  | French               | fra  | 216,624           | 238,463         | 455,087            |
| 4  | Spanish              | spa  | 52,955            | 228,910         | 281,865            |
| 5  | Russian              | rus  | 101,395           | 82,772          | 184,167            |
| 6  | Japanese             | jpn  | 26,921            | 130,893         | 157,814            |
| 7  | Dutch                | nld  | 18,978            | 111,371         | 130,349            |
| 8  | Italian              | ita  | 66,453            | 59,830          | 126,283            |
| 9  | Swedish              | swe  | 39,192            | 71,688          | 110,880            |
| 10 | Polish               | pol  | 14,104            | 76,720          | 90,824             |
| 11 | Portuguese           | por  | 11,390            | 74,721          | 86,111             |
| 12 | Danish               | dan  | 21,239            | 64,799          | 86,038             |
| 13 | Czech                | ces  | 17,202            | 64,442          | 81,644             |
| 14 | Chinese              | zho  | 13,337            | 62,650          | 75,987             |
| 15 | Hungarian            | hun  | 11,256            | 54,989          | 66,245             |
| 16 | Norwegian            | nor  | 14,530            | 45,923          | 60,453             |
| 17 | Serbo-Croatian       | hbs  | 12,743            | 45,036          | 57,779             |
| 18 | Finnish              | fin  | 8,296             | 46,271          | 54,567             |
| 19 | Modern Greek (1453-) | ell  | 4,862             | 27,422          | 32,284             |
| 20 | Bulgarian            | bul  | 3,667             | 25,742          | 29,409             |

**Table S3** Statistics for the twenty languages with the most translations (to and from) in our Index Translationum dataset. The full table is available on the SOM site.

## S2 Language notation and demographics

### S2.1 Notation

Each of our three datasets uses a different system for identifying language names. For the sake of consistency, we converted the language identifiers to ISO 639-3 identifiers. ISO 639-3 is a code that aims to define three-letter identifiers for all known human languages (9). For example, English is represented as *eng*, Spanish as *spa*, Modern Greek as *ell* and Ancient Greek as *grc*.

Some languages are *mutually intelligible* or nearly mutually intelligible with others, such as Serbian and Croatian, Indonesian and Malaysian, and the various regional dialects of Arabic. Because of the similarity of mutually intelligible languages we do not consider their speakers as polyglots. Instead, we merged mutually intelligible languages to macrolanguages following the ISO 639-3 Macrolanguage Mappings (9). For example, we merged 29 varieties of Arabic into one Arabic macrolanguage (*ara*), and Malaysian, Indonesian, and 34 other Bhasa languages into a Malay macrolanguage (*msa*).

Another reason for consolidating languages is that the language detector we used to identify the language of tweets cannot distinguish between the written forms of many mutually intelligible languages, such as Indonesian and Malaysian and Serbian and Croatian. For this reason, we added a couple of merges that are not in the ISO 639-3 macrolanguage mappings: we consolidated Serbian, Croatian, and Bosnian into Serbo-Croatian (*hbs*) even though the latter had been deprecated as a macrolanguage, and merged Tagalog (*tgl*) with Filipino (*fil*) into one Filipino language that uses the identifier *fil*. Our full conversion table is available on the SOM site.

Languages belong to language families (14). We mapped languages to language families using the hierarchy in Ethnologue (15) complemented by information from articles from the English Wikipedia about the respective languages. We used the standard language family names and identifiers as defined by ISO 639-5 (16).



## S2.2 Population

We use language speaker estimates from the June 14, 2012 version of Wikipedia Statistics page (17). These estimates include all speakers of a language, native and non-native alike. We converted language names to ISO 639-3 identifiers and merged them into macrolanguages as explained in **Section S2.1**.

In general, the number of speakers of a macrolanguage is the sum of speakers of its constituent languages. However, for the macrolanguages listed in Table S4 we determined that the estimated number of speakers for one of the individual languages that constitute them includes speakers of the other languages, and used that number as the speaker estimate for the entire macrolanguage. Refer to Table S5 for number of speakers for languages in our datasets.

| Macrolanguage         | ISO 639-3 identifier | Speaker estimate we use in our dataset | Individual languages according to Wikipedia (Wikipedia language code) | Wikipedia Statistics speaker estimate              |
|-----------------------|----------------------|----------------------------------------|-----------------------------------------------------------------------|----------------------------------------------------|
| <b>Akan</b>           | aka                  | 19 million                             | Akan (ak)<br>Twi (tw)                                                 | 19 million<br>15 million                           |
| <b>Arabic</b>         | ara                  | 530 million                            | Arabic (ar)<br>Egyptian Arabic (arz)                                  | 530 million<br>76 million                          |
| <b>Malay</b>          | msa                  | 300 million                            | Malay (ms)<br>Indonesian (id)                                         | 300 million<br>250 million                         |
| <b>Serbo-Croatian</b> | hbs                  | 23 million                             | Serbo-Croatian (sh)<br>Serbian (sr)<br>Croatian (hr)<br>Bosnian (bs)  | 23 million<br>23 million<br>6 million<br>3 million |
| <b>Norwegian</b>      | nor                  | 5 million                              | Norwegian (no)<br>Nynorsk (nn)                                        | 5 million<br>5 million                             |
| <b>Komi</b>           | kom                  | 293,000                                | Komi (kv)<br>Komi-Perniak (koi)                                       | 293,000<br>94,000                                  |

**Table S4** Macrolanguages for which the estimated number of speakers is not the sum of the estimates for the individual languages that constitute them.

|    | Language             | Code | Speakers (millions) | GDP per capita (\$) |
|----|----------------------|------|---------------------|---------------------|
| 1  | Afrikaans            | afr  | 13                  | 10,373              |
| 2  | Albanian             | sqi  | 16                  | 9,182               |
| 3  | Arabic               | ara  | 530                 | 8,720               |
| 4  | Armenian             | hye  | 6                   | 5,598               |
| 5  | Azerbaijani          | aze  | 27                  | 11,902              |
| 6  | Bashkir              | bak  | 2                   |                     |
| 7  | Basque               | eus  | 1                   | 30,626              |
| 8  | Belarusian           | bel  | 6                   | 15,028              |
| 9  | Bengali              | ben  | 230                 | 2,457               |
| 10 | Bulgarian            | bul  | 12                  | 13,488              |
| 11 | Catalan              | cat  | 9                   | 30,626              |
| 12 | Chinese              | zho  | 1575                | 9,207               |
| 13 | Czech                | ces  | 12                  | 27,062              |
| 14 | Danish               | dan  | 6                   | 37,152              |
| 15 | Dutch                | nld  | 27                  | 40,518              |
| 16 | English              | eng  | 1500                | 32,953              |
| 17 | Esperanto            | epo  | 1                   |                     |
| 18 | Estonian             | est  | 1.07                | 20,380              |
| 19 | Filipino             | fil  | 90                  | 4,073               |
| 20 | Finnish              | fin  | 6                   | 36,236              |
| 21 | French               | fra  | 200                 | 15,103              |
| 22 | French (Old)         | fro  |                     |                     |
| 23 | Galician             | glg  | 4                   | 30,626              |
| 24 | Georgian             | kat  | 4                   | 5,491               |
| 25 | German               | deu  | 185                 | 38,268              |
| 26 | German (Middle High) | gmh  |                     |                     |
| 27 | Greek (Ancient)      | grc  |                     |                     |
| 28 | Greek (Modern)       | ell  | 15                  | 26,693              |
| 29 | Haitian              | hat  | 12                  | 1,235               |
| 30 | Hebrew               | heb  | 10                  | 30,975              |
| 31 | Hindi                | hin  | 550                 | 3,696               |
| 32 | Hungarian            | hun  | 15                  | 18,672              |
| 33 | Icelandic            | isl  | 0.32                | 38,061              |
| 34 | Italian              | ita  | 70                  | 30,623              |
| 35 | Japanese             | jpn  | 132                 | 34,740              |
| 36 | Kara-Kalpak          | kaa  | 0.41                |                     |
| 37 | Kazakh               | kaz  | 12                  | 13,001              |
| 38 | Kirghiz              | kir  | 5                   | 2,372               |
| 39 | Korean               | kor  | 78                  | 21,723              |
| 40 | Latin                | lat  | 0.01                |                     |

|    | Language       | Code | Speakers (millions) | GDP per capita (\$) |
|----|----------------|------|---------------------|---------------------|
| 41 | Latvian        | lav  | 2.15                | 15,662              |
| 42 | Lithuanian     | lit  | 4                   | 18,856              |
| 43 | Macedonian     | mkd  | 3                   | 10,367              |
| 44 | Malay          | msa  | 300                 | 6,023               |
| 45 | Malayalam      | mal  | 37                  | 3,694               |
| 46 | Maltese        | mlt  | 0.37                | 25,428              |
| 47 | Maori          | mri  | 0.157               | 27,668              |
| 48 | Marathi        | mar  | 90                  | 3,694               |
| 49 | Moldavian      | mol  | 3.5                 |                     |
| 50 | Mongolian      | mon  | 5                   | 4,744               |
| 51 | Norwegian      | nor  | 5                   | 53,471              |
| 52 | Occitan        | oci  | 2                   |                     |
| 53 | Persian        | fas  | 107                 | 9,826               |
| 54 | Polish         | pol  | 43                  | 20,326              |
| 55 | Portuguese     | por  | 290                 | 11,853              |
| 56 | Romanian       | ron  | 28                  | 11,354              |
| 57 | Russian        | rus  | 278                 | 15,487              |
| 58 | Sanskrit       | san  | 0.05                |                     |
| 59 | Serbo-Croatian | hbs  | 23                  | 12,908              |
| 60 | Sinhala        | sin  | 19                  | 5,674               |
| 61 | Slovak         | slk  | 7                   | 23,432              |
| 62 | Slovenian      | slv  | 2                   | 28,642              |
| 63 | Spanish        | spa  | 500                 | 16,777              |
| 64 | Swahili        | swa  | 50                  | 1,415               |
| 65 | Swedish        | swe  | 10                  | 40,265              |
| 66 | Tajik          | tgk  | 4                   | 2,238               |
| 67 | Tamil          | tam  | 66                  | 3,923               |
| 68 | Tatar          | tat  | 8                   |                     |
| 69 | Thai           | tha  | 73                  | 9,396               |
| 70 | Tibetan        | bod  | 7                   |                     |
| 71 | Turkish        | tur  | 70                  | 14,623              |
| 72 | Turkmen        | tuk  | 9                   | 5,816               |
| 73 | Uighur         | uig  | 10                  |                     |
| 74 | Ukrainian      | ukr  | 45                  | 7,242               |
| 75 | Urdu           | urd  | 60                  | 3,511               |
| 76 | Uzbek          | uzb  | 24                  | 3,182               |
| 77 | Vietnamese     | vie  | 80                  | 3,447               |
| 78 | Welsh          | cym  | 0.75                |                     |
| 79 | Yiddish        | yid  | 3                   |                     |

**Table S5** Population and GDP per capita for the languages used in the GLNs. Blank cells indicate dead languages or insufficient data.

### S2.3 Language GDP

The GDP (*gross domestic product*) per capita for a language  $l$  measures the average contribution of a single speaker of language  $l$  to the world GDP, and is calculated by summing the contributions of speakers of  $l$  to the GDP of every country, and dividing the sum by the number of speakers of  $l$ . A similar method was used by Davis (18). Given a country  $c$ , let  $G_c$  be the GDP per capita (based on purchasing-power-parity) of that country (2011 values; retrieved from the IMF (18) with a few additions from the CIA World Factbook (19)). Also, given a language  $l$ , let  $N_{lc}$  be the number of native speakers of  $l$  in country  $c$ ,

obtained from Ethnologue (15) and The World Factbook (19). We calculated  $N_{lc}$  using the language demographics listed in Table S6. Thus,  $G_l$ , the GDP per capita for  $l$  is

$$G_l = \frac{\sum_c (G_c N_{lc})}{\sum_c N_{lc}}$$

The GDP per capita values in Table S5 are approximate, because the economic activity of a country is not distributed evenly by language. Moreover, a person may contribute in a language different than his or her native language: for example, many use English to communicate at their workplace although English is not their native language. Tables of GDP per capita and population by country and language are available on the SOM site.

### S3 Additional calculations

In this section we briefly document two calculations used in the main text of the paper. First, we note that for all figures we use the number of multilingual speakers, or expressions, from a language. We estimate the number of multilingual speakers or expression from a language ( $N_i$ ) as:

$$N_i = \sum_j M_{ij}$$

Also, we note that we estimate the eigenvector centrality of a language by using:

$$\lambda v_i = \sum_j M_{ij} v_j$$

and finding the eigenvector  $v$ , associated with the largest eigenvalue. Since the eigenvector associated with the largest eigenvalue could be positive or negative, we take the absolute value of the elements of this eigenvector as our measure of a language's eigenvector centrality.

## S4 Language centrality: Eigenvector centrality vs. betweenness centrality

In this section we compare two measures of centrality, *eigenvector centrality* (the metric used in the main text) and *betweenness centrality*. The betweenness centrality of a node is the number of shortest paths from all nodes to all others that pass through that node<sup>31</sup>. This centrality value focuses on quantity rather than quality: all shortest paths that go through a node contribute equally to its betweenness score, regardless of the characteristics of the source and target nodes (e.g., the number of their neighbors or their identity). The eigenvector centrality of a node is the sum of its summed connections to others, weighted by their centralities (20). Eigenvector centrality thus takes into account the quality of a node's connections, by rewarding a node for being connected to "important" nodes. Each node is assigned a relative score based on its connections, and a connection to a high-scoring node contributes more to the eigenvector centrality score of the node being scored than a connection to a low-scoring node.

Figure S3 shows the correlation of eigenvector centrality and betweenness centrality for all languages and datasets. The correlation between the two centrality measures is  $R^2=0.25$  for Twitter,  $R^2=0.62$  for Wikipedia, and  $R^2=0.39$  for book translations. A table with eigenvector and betweenness centralities of each language in the Twitter, Wikipedia and book translation GLNs is available on the SOM site.

The deviations between these two centrality measures are quite informative. For instance, according to betweenness centrality the most central language in the book translations GLN is Russian. Figure 1 in the main text shows why: Russian is the portal to a large number of languages that would otherwise be disconnected from the rest of the network (such as Tatar, Armenian and Kirghiz). All paths to these languages pass through Russian, contributing to Russian's high betweenness score. The same is not true for English, the language with the second-highest betweenness. While English is also highly connected, it is connected to many languages that are connected to others, and is thus located in a part of the network where there are alternative paths that reduce the betweenness of English. At the same time, the fact that English is connected to languages that are connected to others increases its eigenvector centrality.

We chose eigenvector centrality over betweenness, as the former is more suitable for identifying global languages according to our definition: a global language is a language that are connected to other hub languages (such as English in the example from the book translations network above), not a language that serve as the only gateway to many peripheral languages (such as Russian in the above example).

We also had a practical reason for preferring eigenvector centrality to betweenness centrality: the latter is a measure that is unable to differentiate among more peripheral languages, since most languages get a betweenness score of zero (see Figure S3). Eigenvector centrality, on the other hand, can help us differentiate between the positions of languages in the GLN at all levels of centrality, not only among the most central languages.

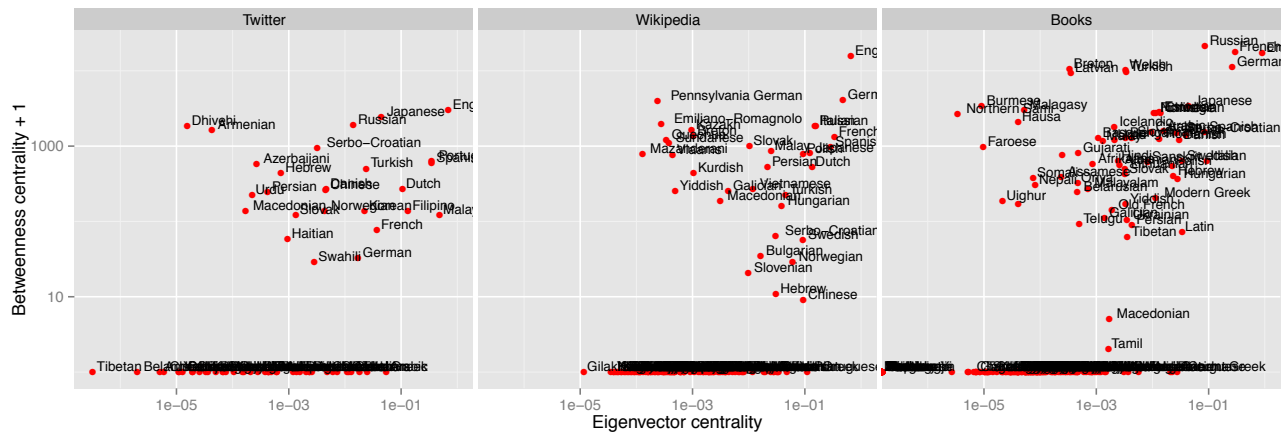

**Figure S3** Comparison between eigenvector centrality and betweenness centrality, calculated as the total number of paths going through a node, for **A** The Twitter GLN **B** The Wikipedia GLN **C** The book translations GLN.

## **S5 Famous people per language**

We measure the cultural impact of a language by the number of its speakers who made a long-lasting cultural impression on the world. We focus on these *famous* people, rather than on ideas or other forms of cultural expression, because people names are easier to identify and match across languages.

We use two separate methods to decide whether a person is famous. The first is having Wikipedia articles in at least 26 language editions, and the second is being included in the *Human Accomplishment* list (21), a list of nearly 4,000 influential people in the arts and sciences, from 800 BCE to 1950. As neither dataset contains information about the language used by the famous people it lists, we start this section by describing how we associated famous people with languages. Then, we dedicate a subsection to each dataset, in which we describe how the dataset was retrieved and prepared for use.

### ***S5.1 Associating a famous person with languages***

Ideally each language would be given a point for each famous person who spoke this language as his or her native language, or who used this language as the main language for his or her main contributions. Unfortunately, this information is not available in a structured format and finding it manually for each person does not scale well for thousands of people. Therefore, we determined a person's language affiliation using the current language demographics for his or her country of birth. Each famous person in our datasets equals one point, which is distributed across the languages spoken in his or her native country according to their population (15, 19). For example, Italian inventor Guglielmo Marconi counts as one point for Italian. Former Canadian Prime Minister Pierre Trudeau contributes 0.59 to English and 0.22 to French. We stress again that our scoring is based on national identity and not on cultural or linguistic identity. Trudeau was a native speaker of French while Leonard Cohen is a native speaker of English, but since both of them are Canadian, each one adds 0.59 points for English and 0.22 points for French, regardless of their native language. Refer to Table S6 for the language demographics of each country.

We determine a person's country of birth using present-day international borders. For example, we code Italy as the country of birth for author Ippolito Nievo, although Italy was unified only shortly before his death in 1861 and at the time of his birth his native Padua was part of the Austrian Empire. In some cases, this method produces unintuitive results. The Ancient Greek historian Herodotus was born in Halicarnassus (present-day Bodrum, Turkey) and would earn points for Turkish, while Mustafa Kemal Atatürk, founder of the Republic of Turkey, was born in Thessaloniki, present-day Greece, and would earn points for Greek. Because our language distribution statistics are from the last few years, we include only people born in 1800 and later, to reduce the effect of geopolitical and cultural changes on our mapping of countries to languages. To match the year limitation of the Human Accomplishment dataset, we also set 1950 as the latest year of birth for the Wikipedia dataset.

Despite some inaccuracies, using present-day countries provides a consistent mapping of people who lived over a period of several millennia to their contemporary countries. Moreover, using present-day countries allows us to use the present-day language distribution statistics for each country to identify the main languages spoken in a country and determine the language affiliation of each person.

|    |                               |                                                                                            |    |                                          |                                              |    |                          |                                                                                                                        |     |                      |                                                                                                                                              |
|----|-------------------------------|--------------------------------------------------------------------------------------------|----|------------------------------------------|----------------------------------------------|----|--------------------------|------------------------------------------------------------------------------------------------------------------------|-----|----------------------|----------------------------------------------------------------------------------------------------------------------------------------------|
| 1  | <b>Afghanistan</b>            | Persian 50%, Pushto 35%, Uzbek 6%, Turkmen 5%                                              | 26 | <b>Brunei</b>                            | Malay 100%                                   | 51 | <b>Ecuador</b>           | Spanish 100%                                                                                                           | 76  | <b>Guinea-Bissau</b> | Upper Guinea Crioulo 44%, Portuguese 14%                                                                                                     |
| 2  | <b>Albania</b>                | Albanian 95%, Greek (Modern) 3%                                                            | 27 | <b>Bulgaria</b>                          | Bulgarian 76.8%, Turkish 8.2%, Romany 3.8%   | 52 | <b>Egypt</b>             | Arabic 100%                                                                                                            | 77  | <b>Guyana</b>        | English 50%                                                                                                                                  |
| 3  | <b>Algeria</b>                | Arabic 80%, French 20%                                                                     | 28 | <b>Burkina Faso</b>                      | French 100%                                  | 53 | <b>El Salvador</b>       | Spanish 100%                                                                                                           | 78  | <b>Haiti</b>         | Haitian 75%, French 25%                                                                                                                      |
| 4  | <b>Andorra</b>                | Catalan 40%, Spanish 35%, Portuguese 15%, French 5.5%                                      | 29 | <b>Burma</b>                             | Burmese 100%                                 | 54 | <b>Equatorial Guinea</b> | Spanish 67.6%, French 20%                                                                                              | 79  | <b>Honduras</b>      | Spanish 100%                                                                                                                                 |
| 5  | <b>Angola</b>                 | Portuguese 70%                                                                             | 30 | <b>Burundi</b>                           | French 50%, Rundi 50%                        | 55 | <b>Eritrea</b>           | Tigrinya 55%, Tigre 16%, Estonian 67.3%, Russian 29.7%, Oromo 33.8%, Amharic 29.3%, Somali 6.2%, Tigre 5.9%, Sidamo 4% | 80  | <b>Hong Kong</b>     | Chinese 95%, English 3.5%                                                                                                                    |
| 6  | <b>Argentina</b>              | Spanish 98%                                                                                | 31 | <b>Cambodia</b>                          | Central Khmer 95%                            | 56 | <b>Estonia</b>           | Estonian 67.3%, Russian 29.7%, Oromo 33.8%, Amharic 29.3%, Somali 6.2%, Tigre 5.9%, Sidamo 4%                          | 81  | <b>Hungary</b>       | Hungarian 93.6%                                                                                                                              |
| 7  | <b>Armenia</b>                | Armenian 97.7%, Russian 0.9%                                                               | 32 | <b>Cameroon</b>                          | French 50%, English 50%                      | 57 | <b>Ethiopia</b>          | Estonian 67.3%, Russian 29.7%, Oromo 33.8%, Amharic 29.3%, Somali 6.2%, Tigre 5.9%, Sidamo 4%                          | 82  | <b>Iceland</b>       | Icelandic 100%                                                                                                                               |
| 8  | <b>Aruba</b>                  | Papiamentu 66.3%, Spanish 12.6%, English 7.7%, Dutch 5.8%                                  | 33 | <b>Canada</b>                            | English 58.8%, French 21.6%                  | 58 | <b>Faroe Islands</b>     | Faroese 100%                                                                                                           | 83  | <b>India</b>         | Hindi 41%, Bengali 8.1%, Telugu 7.2%, Marathi 7%, Tamil 5.9%, Urdu 5%, Gujarati 4.5%, Kannada 3.7%, Oriya 3.2%, Malayalam 3.2%, Panjabi 2.8% |
| 9  | <b>Australia</b>              | English 78.5%, Chinese 2.5%, Italian 1.6%, Greek (Modern) 1.3%, Arabic 1.2%, Vietnamese 1% | 34 | <b>Cape Verde</b>                        | Portuguese 100%                              | 59 | <b>Fiji</b>              | Fiji Hindi 45.3%, Fijian 39.3%                                                                                         | 84  | <b>Indonesia</b>     | Malay 100%                                                                                                                                   |
| 10 | <b>Austria</b>                | German 88.6%, Serbo-Croatian 3.8%, Turkish 2.3%                                            | 35 | <b>Central African Republic</b>          | Sango 80%, French 20%                        | 60 | <b>Finland</b>           | Finnish 91.2%, Swedish 5.5%                                                                                            | 85  | <b>Iran</b>          | Persian 53%, Azerbaijani 18%, Kurdish 10%, Luri 6%, Arabic 2%                                                                                |
| 11 | <b>Azerbaijan</b>             | Azerbaijani 90.3%, Lezghian 2.2%, Russian 1.8%, Armenian 1.5%                              | 36 | <b>Chad</b>                              | Arabic 50%, French 50%                       | 61 | <b>France</b>            | French 100%                                                                                                            | 86  | <b>Iraq</b>          | Arabic 80%, Kurdish 15%                                                                                                                      |
| 12 | <b>Bahamas, The</b>           | English 100%                                                                               | 37 | <b>Chile</b>                             | Spanish 100%                                 | 62 | <b>French Guiana</b>     | French 100%                                                                                                            | 87  | <b>Ireland</b>       | English 95%, Irish 2%                                                                                                                        |
| 13 | <b>Bahrain</b>                | Arabic 100%                                                                                | 38 | <b>China</b>                             | Chinese 100%                                 | 63 | <b>Gabon</b>             | French 75%, Fang 25%                                                                                                   | 88  | <b>Ile of Man</b>    | English 100%                                                                                                                                 |
| 14 | <b>Bangladesh</b>             | Bengali 98%                                                                                | 39 | <b>Colombia</b>                          | Spanish 100%                                 | 64 | <b>Gambia, The</b>       | English 100%                                                                                                           | 89  | <b>Israel</b>        | Hebrew 80%, Arabic 15%                                                                                                                       |
| 15 | <b>Barbados</b>               | English 100%                                                                               | 40 | <b>Congo, Democratic Republic of the</b> | French 33%, Swahili 20%, Lingala 20%         | 65 | <b>Georgia</b>           | Georgian 71%, Russian 9%, Armenian 7%, Azerbaijani 6%                                                                  | 90  | <b>Italy</b>         | Italian 100%                                                                                                                                 |
| 16 | <b>Belarus</b>                | Russian 70.2%, Belarusian 23.4%                                                            | 41 | <b>Congo, Republic of the</b>            | French 30%, Ibali Teké 17%, Lingala 13%      | 66 | <b>Germany</b>           | German 100%                                                                                                            | 91  | <b>Jamaica</b>       | English 100%                                                                                                                                 |
| 17 | <b>Belgium</b>                | Dutch 60%, French 40%                                                                      | 42 | <b>Costa Rica</b>                        | Spanish 100%                                 | 67 | <b>Ghana</b>             | Akan 24.7%, English 21.3%, Ewe 12.7%, Abon 4.6%                                                                        | 92  | <b>Japan</b>         | Japanese 100%                                                                                                                                |
| 18 | <b>Belize</b>                 | English 41%, Spanish 32%                                                                   | 43 | <b>Cote d'Ivoire</b>                     | French 50%, Baoulé 14%                       | 68 | <b>Gibraltar</b>         | English 100%                                                                                                           | 93  | <b>Jersey</b>        | English 94.5%, Portuguese 4.6%                                                                                                               |
| 19 | <b>Benin</b>                  | French 40%, Fon 39%, Yoruba 12%                                                            | 44 | <b>Croatia</b>                           | Serbo-Croatian 100%                          | 69 | <b>Greece</b>            | Greek (Modern) 99%                                                                                                     | 94  | <b>Jordan</b>        | Arabic 100%                                                                                                                                  |
| 20 | <b>Bermuda</b>                | English 100%                                                                               | 45 | <b>Cuba</b>                              | Spanish 100%                                 | 70 | <b>Greenland</b>         | Danish 100%                                                                                                            | 95  | <b>Kazakhstan</b>    | Kazakh 63%, Russian 24%                                                                                                                      |
| 21 | <b>Bhutan</b>                 | Tshangla 28%, Dzongkha 24%, Nepali 22%                                                     | 46 | <b>Cyprus</b>                            | Greek (Modern) 77%, Turkish 18%              | 71 | <b>Grenada</b>           | English 87%, French 2%                                                                                                 | 96  | <b>Kenya</b>         | Swahili 80%, English 20%                                                                                                                     |
| 22 | <b>Bolivia</b>                | Spanish 60.7%, Quechua 21.2%, Aymara 14.6%                                                 | 47 | <b>Czech Republic</b>                    | Czech 95.4%, Slovak 1.6%                     | 72 | <b>Guadeloupe</b>        | French 99%                                                                                                             | 97  | <b>Kiribati</b>      | Gilbertese 62.6%                                                                                                                             |
| 23 | <b>Bosnia and Herzegovina</b> | Serbo-Croatian 100%                                                                        | 48 | <b>Denmark</b>                           | Danish 100%                                  | 73 | <b>Guam</b>              | English 38.3%, Chamorro 22.2%, Filipino 22.2%                                                                          | 98  | <b>Korea, North</b>  | Korean 100%                                                                                                                                  |
| 24 | <b>Botswana</b>               | Tswana 78.2%, Kalanga 7.9%, English 2.1%                                                   | 49 | <b>Djibouti</b>                          | Somali 38%, Arabic 20%, French 20%, Afar 13% | 74 | <b>Guatemala</b>         | Spanish 60%                                                                                                            | 99  | <b>Korea, South</b>  | Korean 100%                                                                                                                                  |
| 25 | <b>Brazil</b>                 | Portuguese 100%                                                                            | 50 | <b>Dominican Republic</b>                | Spanish 100%                                 | 75 | <b>Guinea</b>            | French 100%                                                                                                            | 100 | <b>Kosovo</b>        | Albanian 100%                                                                                                                                |

**Table S6** Language demographics by country. Values for each country add to 100% or less (continued next page)



|     |                   |                                                                                  |     |                              |                                                                                  |     |                              |                                                                                                                         |     |                             |                                                                         |
|-----|-------------------|----------------------------------------------------------------------------------|-----|------------------------------|----------------------------------------------------------------------------------|-----|------------------------------|-------------------------------------------------------------------------------------------------------------------------|-----|-----------------------------|-------------------------------------------------------------------------|
| 101 | <b>Kuwait</b>     | Arabic 100%                                                                      | 126 | <b>Morocco</b>               | Arabic 90%                                                                       | 151 | <b>Russia</b>                | Russian 100%                                                                                                            | 176 | <b>Taiwan</b>               | Chinese 100%                                                            |
| 102 | <b>Kyrgyzstan</b> | Kirghiz 64.7%, Uzbek 13.6%, Russian 12.5%                                        | 127 | <b>Mozambique</b>            | Makhuwa 25.3%, Portuguese 10.7%, Tsonga 10.3%, Sena 7.5%, Lomwe 7%, Chuwabu 5.1% | 152 | <b>Rwanda</b>                | Kinyarwanda 98%                                                                                                         | 177 | <b>Tajikistan</b>           | Tajik 100%                                                              |
| 103 | <b>Laos</b>       | Lao 100%                                                                         | 128 | <b>Namibia</b>               | Afrikaans 60%, German 32%, English 7%                                            | 153 | <b>Saint Kitts and Nevis</b> | English 100%                                                                                                            | 178 | <b>Tanzania</b>             | Swahili 100%                                                            |
| 104 | <b>Latvia</b>     | Latvian 58.2%, Russian 37.5%                                                     | 129 | <b>Nauru</b>                 | Nauru 100%                                                                       | 154 | <b>Saint Lucia</b>           | English 100%                                                                                                            | 179 | <b>Thailand</b>             | Thai 100%                                                               |
| 105 | <b>Lebanon</b>    | Arabic 80%, French 20%                                                           | 130 | <b>Nepal</b>                 | Nepali 47.8%, Maithili 12.1%, Bhojpuri 7.4%                                      | 155 | <b>Samoa</b>                 | Samoan 90%, English 10%                                                                                                 | 180 | <b>Timor-Leste</b>          | Tetum 36.6%, English 31.4%, Portuguese 23.5%                            |
| 106 | <b>Lesotho</b>    | Southern Sotho 100%                                                              | 131 | <b>Netherlands</b>           | Dutch 100%                                                                       | 156 | <b>Saudi Arabia</b>          | Arabic 100%                                                                                                             | 181 | <b>Togo</b>                 | French 30%                                                              |
| 107 | <b>Liberia</b>    | English 20%                                                                      | 132 | <b>New Caledonia</b>         | French 97%                                                                       | 157 | <b>Senegal</b>               | Wolof 70%, French 10%                                                                                                   | 182 | <b>Tonga</b>                | Tonga (Tonga Islands) 70%, English 30%                                  |
| 108 | <b>Libya</b>      | Arabic 95%                                                                       | 133 | <b>New Zealand</b>           | English 91.2%, Maori 3.9%, Samoan 2.1%, Chinese 2.1%, French 1.3%, Hindi 1.1%    | 158 | <b>Serbia</b>                | Serbo-Croatian 90.1%, Hungarian 3.8%, Romany 1.1%                                                                       | 183 | <b>Trinidad and Tobago</b>  | English 90%                                                             |
| 109 | <b>Lithuania</b>  | Lithuanian 82%, Russian 8%, Polish 5.6%                                          | 134 | <b>Nicaragua</b>             | Spanish 97.5%                                                                    | 159 | <b>Seychelles</b>            | Seselwa Creole French 91%, English 4.9%                                                                                 | 184 | <b>Tunisia</b>              | Arabic 100%                                                             |
| 110 | <b>Luxembourg</b> | Luxembourgish 77%, French 6%, German 4%, English 1%                              | 135 | <b>Niger</b>                 | Hausa 49.6%, Zarma 25.5%, Tamashek 8.4%, Fulah 8.3%, French 5%                   | 160 | <b>Sierra Leone</b>          | Krio 90%                                                                                                                | 185 | <b>Turkey</b>               | Turkish 85.4%, Kurdish 12%, Arabic 1.2%                                 |
| 111 | <b>Macedonia</b>  | Macedonian 66.5%, Albanian 25.1%, Turkish 3.5%, Romany 1.9%, Serbo-Croatian 1.2% | 136 | <b>Nigeria</b>               | English 30%                                                                      | 161 | <b>Singapore</b>             | Chinese 58.8%, English 23%, Malay 14.1%, Tamil 3.2%                                                                     | 186 | <b>Turkmen-istan</b>        | Turkmen 72%, Russian 12%, Uzbek 9%                                      |
| 112 | <b>Madagascar</b> | French 70%, Malagasy 30%                                                         | 137 | <b>Norway</b>                | Norwegian 100%                                                                   | 162 | <b>Slovakia</b>              | Slovak 83.9%, Hungarian 10.7%, Romany 1.8%, Ukrainian 1%                                                                | 187 | <b>Uganda</b>               | Ganda 14%, English 8%                                                   |
| 113 | <b>Malawi</b>     | Nyanja 70%, Yao 10.1%, Tumbuka 9.5%                                              | 138 | <b>Oman</b>                  | Arabic 100%                                                                      | 163 | <b>Slovenia</b>              | Slovenian 91.1%, Serbo-Croatian 4.5%                                                                                    | 188 | <b>Ukraine</b>              | Ukrainian 67%, Russian 24%                                              |
| 114 | <b>Malaysia</b>   | Malay 100%                                                                       | 139 | <b>Pakistan</b>              | Panjabi 48%, Sindhi 12%, Lahnda 10%, Urdu 8%, Pushto 8%                          | 164 | <b>Solomon Islands</b>       | English 2%                                                                                                              | 189 | <b>United Arab Emirates</b> | Arabic 100%                                                             |
| 115 | <b>Maldives</b>   | Dhivehi 100%                                                                     | 140 | <b>Palestinian Authority</b> | Arabic 100%                                                                      | 165 | <b>Somalia</b>               | Somali 80%, Arabic 20%                                                                                                  | 190 | <b>United Kingdom</b>       | English 100%                                                            |
| 116 | <b>Mali</b>       | Bambara 46.3%, French 10%, Fulah 9.4%, Soninke 6.4%                              | 141 | <b>Panama</b>                | Spanish 100%                                                                     | 166 | <b>South Africa</b>          | Zulu 23.82%, Xhosa 17.64%, Afrikaans 13.35%, Pedi 9.39%, Tswana 8.2%, English 8.2%, Southern Sotho 7.93%                | 191 | <b>United States</b>        | English 82.1%, Spanish 10.7%                                            |
| 117 | <b>Malta</b>      | Maltese 90.2%, English 6%                                                        | 142 | <b>Papua New Guinea</b>      | English 2%, Tok Pisin 1.8%                                                       | 167 | <b>South Sudan</b>           | Arabic 50%                                                                                                              | 192 | <b>Uruguay</b>              | Spanish 100%                                                            |
| 118 | <b>Martinique</b> | French 100%                                                                      | 143 | <b>Paraguay</b>              | Guarani 50%, Spanish 50%                                                         | 168 | <b>Spain</b>                 | Spanish 74%, Catalan 17%, Galician 7%, Basque 2%                                                                        | 193 | <b>Uzbekistan</b>           | Uzbek 74.3%, Russian 14.2%, Tajik 4.4%                                  |
| 119 | <b>Mauritania</b> | Arabic 100%                                                                      | 144 | <b>Peru</b>                  | Spanish 84.1%, Quechua 13%, Aymara 1.7%                                          | 169 | <b>Sri Lanka</b>             | Sinhala 74%, Tamil 18%                                                                                                  | 194 | <b>Vanuatu</b>              | Bislama 23.1%, English 1.9%, French 1.4%                                |
| 120 | <b>Mauritius</b>  | Bhojpuri 12.1%, French 3.4%, English 1%                                          | 145 | <b>Philippines</b>           | Filipino 100%                                                                    | 170 | <b>Sudan</b>                 | Arabic 100%                                                                                                             | 195 | <b>Venezuela</b>            | Spanish 100%                                                            |
| 121 | <b>Mexico</b>     | Spanish 98.5%                                                                    | 146 | <b>Poland</b>                | Polish 97.8%                                                                     | 171 | <b>Suriname</b>              | Dutch 60%                                                                                                               | 196 | <b>Vietnam</b>              | Vietnamese 100%                                                         |
| 122 | <b>Moldova</b>    | Romanian 76.5%, Russian 11.2%, Ukrainian 4.4%, Gagauz 4%, Bulgarian 1.6%         | 147 | <b>Portugal</b>              | Portuguese 100%                                                                  | 172 | <b>Swaziland</b>             | Swati 98%                                                                                                               | 197 | <b>Virgin Islands</b>       | English 74.7%, Spanish 16.8%, French 6.6%                               |
| 123 | <b>Monaco</b>     | French 100%                                                                      | 148 | <b>Puerto Rico</b>           | Spanish 90%, English 10%                                                         | 173 | <b>Sweden</b>                | Swedish 100%                                                                                                            | 198 | <b>Yemen</b>                | Arabic 100%                                                             |
| 124 | <b>Mongolia</b>   | Mongolian 90%                                                                    | 149 | <b>Qatar</b>                 | Arabic 100%                                                                      | 174 | <b>Switzerland</b>           | German 63.7%, French 20.4%, Italian 6.5%, Serbo-Croatian 1.5%, Albanian 1.3%, Portuguese 1.2%, Spanish 1.1%, English 1% | 199 | <b>Zambia</b>               | Bemba 30.1%, English 16%, Nyanja 10.7%, Tonga (Zambia) 10.6%, Lozi 5.7% |
| 125 | <b>Montenegro</b> | Serbo-Croatian 91.1%, Albanian 5.3%                                              | 150 | <b>Romania</b>               | Romanian 91%, Hungarian 6.7%, Romany 1.1%                                        | 175 | <b>Syria</b>                 | Arabic 100%                                                                                                             | 200 | <b>Zimbabwe</b>             | Shona 70%, North Ndebele 20%, English 2.5%                              |

## **S5.2 Wikipedia**

Wikipedia is available in more than 270 language editions. As Wikipedia is collaboratively authored, each edition reflects the knowledge of the language community that contributed to it (22, 23). For example, an article about Plato in the Filipino Wikipedia indicates that Plato is known enough among speakers of Filipino to motivate some of them to write an article about him. While a Wikipedia article in just one language can be the result of short-lived fame within a limited community, a person with articles written about him or her in many languages has likely made a substantial cultural contribution that impacted people from a diverse linguistic and cultural background.

We compiled our *Wikipedia* dataset of famous people as follows. We started by retrieving a table of 2,345,208 people from *Freebase* ([www.freebase.com](http://www.freebase.com)), a collaboratively curated repository of structured data of millions of entities, such places and people. We used a data dump from November 4, 2012; the latest version of the table is available from Freebase (24). For each person, the table contains his or her name, date of birth, place of birth, occupation, and additional information. In addition, for each person with an article in the English Wikipedia, Freebase stores the *Wikipedia unique identifier* (known as *pageid* or *curid*) of the respective article, which we retrieved through the Freebase API (25). The *pageid* and the Wikipedia API (26) were used to find the number of language editions in which a person had an article. Then, the *pageid*, Wikipedia article name, and number of languages of each article were added to the table retrieved from Freebase.

We matched 991,684 people with the English Wikipedia, from which we selected 216,280 people with a defined date of birth, place of birth and gender. We then restricted this list to include only the 11,340 people who had articles in at least 26 Wikipedia language editions and a defined date of birth, place of birth and gender. We then validated the places of birth for all people on the list and converted them to a standardized format (e.g., entries such as “NYC”, “New York” or “New York City” were all converted to “New York, NY, US”). After examining biographical articles in all Wikipedia language editions, we found that there is no biography that appears in at least 26 languages or more that does not have an English version. Thus, by compiling biographies from the English Wikipedia we capture the famous people in any other Wikipedia language. The 26-language threshold generated a group that

is exclusive enough while still containing enough data points, and was within a reasonable size that allowed a comprehensive curation and normalization effort. For comparison, a 20-language threshold would give us 13,334 articles, and a 30-language threshold would give us 6,336 articles.

Next, we converted dates to a standard four-digit year format. While doing so, we fixed all BCE years, which the Freebase dump listed one year off. For example, Jesus's year of birth was listed as 3 BCE instead of 4 BCE. We then used the Google Geocoding API (27) to resolve the listed places of birth to latitude-longitude coordinates, and used the GeoNames database ([www.geonames.com](http://www.geonames.com)) to resolve the coordinates into the present-day name of the country in which each person was born. After dropping records with an ambiguous place of birth we remained with 10,773 people—to which we refer henceforth as the *Wikipedia 26* dataset. Finally, we converted countries to languages as described in Section 4.1 above. To increase the accuracy of the conversion, we selected from the *Wikipedia 26* dataset only the 4,886 people who were born after 1800 and before 1950.

The following tables show the number of famous people in the *Wikipedia 26* dataset for each country (Table S7) and language (Table S8).

|    | Country                           | People (all years) | People (1800-1950) |     | Country                      | People (all years) | People (1800-1950) |     | Country               | People (all years) | People (1800-1950) |
|----|-----------------------------------|--------------------|--------------------|-----|------------------------------|--------------------|--------------------|-----|-----------------------|--------------------|--------------------|
| 1  | Afghanistan                       | 21                 | 10                 | 67  | Greece                       | 140                | 34                 | 133 | Nigeria               | 23                 | 6                  |
| 2  | Albania                           | 15                 | 7                  | 68  | Greenland                    | 1                  |                    | 134 | Norway                | 59                 | 33                 |
| 3  | Algeria                           | 17                 | 11                 | 69  | Guadeloupe                   | 4                  | 1                  | 135 | Oman                  | 2                  | 1                  |
| 4  | Andorra                           | 1                  |                    | 70  | Guam                         | 1                  | 1                  | 136 | Pakistan              | 28                 | 13                 |
| 5  | Angola                            | 5                  | 4                  | 71  | Guatemala                    | 5                  | 2                  | 137 | Palestinian State     | 14                 | 2                  |
| 6  | Antigua and Barbuda               | 1                  | 1                  | 72  | Guinea                       | 5                  | 3                  | 138 | Panama                | 4                  | 3                  |
| 7  | Argentina                         | 102                | 33                 | 73  | Guinea-Bissau                | 3                  | 3                  | 139 | Paraguay              | 13                 | 3                  |
| 8  | Armenia                           | 12                 | 4                  | 74  | Guyana                       | 1                  |                    | 140 | Peru                  | 21                 | 12                 |
| 9  | Aruba                             | 1                  | 1                  | 75  | Haiti                        | 7                  | 2                  | 141 | Philippines           | 19                 | 16                 |
| 10 | Australia                         | 95                 | 28                 | 76  | Honduras                     | 4                  | 1                  | 142 | Poland                | 167                | 114                |
| 11 | Austria                           | 139                | 91                 | 77  | Hong Kong                    | 5                  |                    | 143 | Portugal              | 88                 | 16                 |
| 12 | Azerbaijan                        | 15                 | 6                  | 78  | Hungary                      | 81                 | 58                 | 144 | Puerto Rico           | 6                  |                    |
| 13 | Bahrain                           | 1                  | 1                  | 79  | Iceland                      | 15                 | 8                  | 145 | Qatar                 | 1                  |                    |
| 14 | Bangladesh                        | 8                  | 7                  | 80  | India                        | 136                | 69                 | 146 | Romania               | 50                 | 26                 |
| 15 | Barbados                          | 1                  |                    | 81  | Indonesia                    | 8                  | 7                  | 147 | Russia                | 369                | 240                |
| 16 | Belarus                           | 22                 | 10                 | 82  | Iran                         | 61                 | 20                 | 148 | Rwanda                | 1                  | 1                  |
| 17 | Belgium                           | 103                | 40                 | 83  | Iraq                         | 29                 | 8                  | 149 | Saint Kitts and Nevis | 1                  |                    |
| 18 | Benin                             | 3                  | 1                  | 84  | Ireland                      | 73                 | 29                 | 150 | Saint Lucia           | 2                  | 2                  |
| 19 | Bermuda                           | 1                  |                    | 85  | Isle of Man                  | 4                  | 3                  | 151 | Samoa                 | 1                  | 1                  |
| 20 | Bhutan                            | 4                  | 1                  | 86  | Israel                       | 73                 | 20                 | 152 | Sao Tome and Principe | 1                  | 1                  |
| 21 | Bolivia                           | 3                  | 1                  | 87  | Italy                        | 793                | 194                | 153 | Saudi Arabia          | 35                 | 9                  |
| 22 | Bosnia and Herzegovina            | 26                 | 8                  | 88  | Jamaica                      | 10                 | 3                  | 154 | Senegal               | 10                 | 2                  |
| 23 | Botswana                          | 4                  | 3                  | 89  | Japan                        | 137                | 75                 | 155 | Serbia                | 60                 | 12                 |
| 24 | Brazil                            | 137                | 53                 | 90  | Jersey                       | 1                  |                    | 156 | Seychelles            | 1                  | 1                  |
| 25 | Brunei                            | 1                  | 1                  | 91  | Jordan                       | 7                  | 3                  | 157 | Sierra Leone          | 1                  |                    |
| 26 | Bulgaria                          | 29                 | 8                  | 92  | Kazakhstan                   | 10                 | 6                  | 158 | Singapore             | 7                  | 4                  |
| 27 | Burkina Faso                      | 2                  | 1                  | 93  | Kenya                        | 10                 | 8                  | 159 | Slovakia              | 24                 | 6                  |
| 28 | Burma                             | 7                  | 7                  | 94  | Korea, North                 | 6                  | 4                  | 160 | Slovenia              | 15                 | 3                  |
| 29 | Burundi                           | 1                  |                    | 95  | Korea, South                 | 37                 | 17                 | 161 | Solomon Islands       | 1                  |                    |
| 30 | Cambodia                          | 5                  | 2                  | 96  | Kosovo                       | 7                  |                    | 162 | Somalia               | 8                  | 3                  |
| 31 | Cameroon                          | 11                 | 2                  | 97  | Kuwait                       | 3                  | 2                  | 163 | South Africa          | 43                 | 22                 |
| 32 | Canada                            | 106                | 46                 | 98  | Kyrgyzstan                   | 5                  | 4                  | 164 | South Sudan           | 1                  | 1                  |
| 33 | Cape Verde                        | 4                  | 1                  | 99  | Laos                         | 1                  | 1                  | 165 | Spain                 | 298                | 77                 |
| 34 | Central African Republic          | 1                  | 1                  | 100 | Latvia                       | 18                 | 11                 | 166 | Sri Lanka             | 6                  | 5                  |
| 35 | Chad                              | 2                  |                    | 101 | Lebanon                      | 13                 | 6                  | 167 | Sudan                 | 4                  | 4                  |
| 36 | Chile                             | 27                 | 13                 | 102 | Lesotho                      | 1                  |                    | 168 | Suriname              | 5                  | 2                  |
| 37 | China                             | 94                 | 37                 | 103 | Liberia                      | 5                  | 2                  | 169 | Swaziland             | 1                  |                    |
| 38 | Colombia                          | 17                 | 3                  | 104 | Libya                        | 11                 | 2                  | 170 | Sweden                | 135                | 61                 |
| 39 | Congo, Democratic Republic of the | 7                  | 3                  | 105 | Lithuania                    | 28                 | 19                 | 171 | Switzerland           | 102                | 56                 |
| 40 | Congo, Republic of                | 2                  | 1                  | 106 | Luxembourg                   | 8                  | 4                  | 172 | Syria                 | 19                 | 2                  |
| 41 | Costa Rica                        | 3                  | 1                  | 107 | Macedonia                    | 15                 | 3                  | 173 | Taiwan                | 10                 | 4                  |
| 42 | Cote d'Ivoire                     | 15                 | 3                  | 108 | Madagascar                   | 2                  | 1                  | 174 | Tajikistan            | 1                  |                    |
| 43 | Croatia                           | 56                 | 10                 | 109 | Malawi                       | 4                  | 4                  | 175 | Tanzania              | 3                  | 3                  |
| 44 | Cuba                              | 13                 | 9                  | 110 | Malaysia                     | 6                  | 4                  | 176 | Thailand              | 7                  | 5                  |
| 45 | Cyprus                            | 9                  | 5                  | 111 | Maldives                     | 3                  | 1                  | 177 | Timor-Leste           | 3                  | 3                  |
| 46 | Czech Republic                    | 105                | 53                 | 112 | Mali                         | 8                  | 4                  | 178 | Togo                  | 5                  | 2                  |
| 47 | Denmark                           | 99                 | 39                 | 113 | Malta                        | 3                  | 2                  | 179 | Tonga                 | 2                  | 1                  |
| 48 | Djibouti                          | 1                  |                    | 114 | Martinique                   | 3                  | 2                  | 180 | Trinidad and Tobago   | 5                  | 2                  |
| 49 | Dominican Republic                | 2                  | 1                  | 115 | Mauritania                   | 1                  |                    | 181 | Tunisia               | 18                 | 7                  |
| 50 | Ecuador                           | 4                  | 1                  | 116 | Mauritius                    | 1                  | 1                  | 182 | Turkey                | 184                | 35                 |
| 51 | Egypt                             | 68                 | 24                 | 117 | Mexico                       | 56                 | 23                 | 183 | Turkmenistan          | 3                  | 1                  |
| 52 | El Salvador                       | 3                  | 1                  | 118 | Micronesia, Federated States | 1                  | 1                  | 184 | Uganda                | 5                  | 3                  |
| 53 | Equatorial Guinea                 | 1                  | 1                  | 119 | Moldova                      | 5                  | 2                  | 185 | Ukraine               | 100                | 58                 |
| 54 | Eritrea                           | 1                  | 1                  | 120 | Monaco                       | 4                  | 1                  | 186 | United Arab Emirates  | 5                  | 4                  |
| 55 | Estonia                           | 15                 | 9                  | 121 | Mongolia                     | 8                  | 1                  | 187 | United Kingdom        | 1,140              | 508                |
| 56 | Ethiopia                          | 10                 | 6                  | 122 | Montenegro                   | 10                 | 4                  | 188 | United States         | 2,291              | 1,221              |
| 57 | Faroe Islands                     | 1                  | 1                  | 123 | Morocco                      | 14                 | 7                  | 189 | Uruguay               | 23                 | 7                  |
| 58 | Finland                           | 63                 | 34                 | 124 | Mozambique                   | 6                  | 3                  | 190 | Uzbekistan            | 9                  | 1                  |
| 59 | France                            | 857                | 397                | 125 | Namibia                      | 2                  | 2                  | 191 | Vanuatu               | 1                  | 1                  |
| 60 | French Guiana                     | 1                  |                    | 126 | Nauru                        | 1                  |                    | 192 | Venezuela             | 12                 | 3                  |
| 61 | Gabon                             | 3                  | 3                  | 127 | Nepal                        | 4                  | 3                  | 193 | Vietnam               | 10                 | 9                  |
| 62 | Gambia, The                       | 1                  |                    | 128 | Netherlands                  | 162                | 56                 | 194 | Virgin Islands        | 2                  | 1                  |
| 63 | Georgia                           | 21                 | 12                 | 129 | New Caledonia                | 2                  |                    | 195 | Yemen                 | 6                  | 2                  |
| 64 | Germany                           | 740                | 407                | 130 | New Zealand                  | 17                 | 9                  | 196 | Zambia                | 3                  | 3                  |
| 65 | Ghana                             | 17                 | 4                  | 131 | Nicaragua                    | 5                  | 5                  | 197 | Zimbabwe              | 7                  | 4                  |
| 66 | Gibraltar                         | 1                  |                    | 132 | Niger                        | 1                  | 1                  |     |                       | 10,773             | 4,886              |

**Table S7** Number of people with articles in at least 26 Wikipedia language editions, by *country*.

|    | Language           | Code | People (all years) | People (1800-1950) |    | Language              | Code | People (all years) | People (1800-1950) |
|----|--------------------|------|--------------------|--------------------|----|-----------------------|------|--------------------|--------------------|
| 1  | <b>Afrikaans</b>   | afr  | 6.94               | 4.14               | 33 | <b>Latvian</b>        | lav  | 10.48              | 6.4                |
| 2  | <b>Albanian</b>    | sqi  | 26.87              | 8.34               | 34 | <b>Lithuanian</b>     | lit  | 22.96              | 15.58              |
| 3  | <b>Arabic</b>      | ara  | 273.07             | 94.46              | 35 | <b>Macedonian</b>     | mkd  | 9.97               | 2                  |
| 4  | <b>Armenian</b>    | hye  | 13.42              | 4.84               | 36 | <b>Malay</b>          | msa  | 15.99              | 12.56              |
| 5  | <b>Azerbaijani</b> | aze  | 25.79              | 9.74               | 37 | <b>Malayalam</b>      | mal  | 4.35               | 2.21               |
| 6  | <b>Basque</b>      | eus  | 5.96               | 1.54               | 38 | <b>Maltese</b>        | mlt  | 2.71               | 1.8                |
| 7  | <b>Belarusian</b>  | bel  | 5.15               | 2.34               | 39 | <b>Maori</b>          | mri  | 0.66               | 0.35               |
| 8  | <b>Bengali</b>     | ben  | 18.86              | 12.45              | 40 | <b>Marathi</b>        | mar  | 9.52               | 4.83               |
| 9  | <b>Bulgarian</b>   | bul  | 22.35              | 6.18               | 41 | <b>Modern Greek</b>   | ell  | 147.22             | 38.08              |
| 10 | <b>Catalan</b>     | cat  | 51.06              | 13.09              | 42 | <b>Mongolian</b>      | mon  | 7.2                | 0.9                |
| 11 | <b>Chinese</b>     | zho  | 115.6              | 44.24              | 43 | <b>Norwegian</b>      | nor  | 59                 | 33                 |
| 12 | <b>Czech</b>       | ces  | 100.17             | 50.56              | 44 | <b>Persian</b>        | fas  | 42.83              | 15.6               |
| 13 | <b>Danish</b>      | dan  | 100                | 39                 | 45 | <b>Polish</b>         | pol  | 164.89             | 112.56             |
| 14 | <b>Dutch</b>       | nld  | 226.86             | 81.26              | 46 | <b>Portuguese</b>     | por  | 235.69             | 74.92              |
| 15 | <b>English</b>     | eng  | 3300.8             | 1617.77            | 47 | <b>Romanian</b>       | ron  | 49.33              | 25.19              |
| 16 | <b>Estonian</b>    | est  | 10.1               | 6.06               | 48 | <b>Russian</b>        | rus  | 429.38             | 272.91             |
| 17 | <b>Filipino</b>    | fil  | 19.22              | 16.22              | 49 | <b>Serbo-Croatian</b> | hbs  | 152.84             | 36.92              |
| 18 | <b>Finnish</b>     | fin  | 57.46              | 31.01              | 50 | <b>Sinhala</b>        | sin  | 4.44               | 3.7                |
| 19 | <b>French</b>      | fra  | 997.7              | 455.51             | 51 | <b>Slovak</b>         | slk  | 21.82              | 5.88               |
| 20 | <b>Galician</b>    | glg  | 20.86              | 5.39               | 52 | <b>Slovenian</b>      | slv  | 13.66              | 2.73               |
| 21 | <b>Georgian</b>    | kat  | 14.91              | 8.52               | 53 | <b>Spanish</b>        | spa  | 774.64             | 305.48             |
| 22 | <b>German</b>      | deu  | 929.09             | 524.1              | 54 | <b>Swahili</b>        | swa  | 12.4               | 10                 |
| 23 | <b>Haitian</b>     | hat  | 5.25               | 1.5                | 55 | <b>Swedish</b>        | swe  | 138.47             | 62.87              |
| 24 | <b>Hebrew</b>      | heb  | 58.4               | 16                 | 56 | <b>Tajik</b>          | tgk  | 1.4                | 0.04               |
| 25 | <b>Hindi</b>       | hin  | 55.95              | 28.39              | 57 | <b>Tamil</b>          | tam  | 9.33               | 5.1                |
| 26 | <b>Hungarian</b>   | hun  | 84.01              | 57.13              | 58 | <b>Thai</b>           | tha  | 7                  | 5                  |
| 27 | <b>Icelandic</b>   | isl  | 15                 | 8                  | 59 | <b>Turkish</b>        | tur  | 164.86             | 33.64              |
| 28 | <b>Italian</b>     | ita  | 801.15             | 198.09             | 60 | <b>Turkmen</b>        | tuk  | 3.21               | 1.22               |
| 29 | <b>Japanese</b>    | jpn  | 137                | 75                 | 61 | <b>Ukrainian</b>      | ukr  | 67.46              | 39.01              |
| 30 | <b>Kazakh</b>      | kaz  | 6.3                | 3.78               | 62 | <b>Urdu</b>           | urd  | 9.04               | 4.49               |
| 31 | <b>Kirghiz</b>     | kir  | 3.23               | 2.59               | 63 | <b>Uzbek</b>          | uzb  | 8.9                | 1.98               |
| 32 | <b>Korean</b>      | kor  | 43                 | 21                 | 64 | <b>Vietnamese</b>     | vie  | 10.95              | 9.28               |

**Table S8** Number of people with articles in at least 26 Wikipedia language editions, by *language*.

### **S5.3 Human Accomplishment**

The book *Human Accomplishment: The Pursuit of Excellence in the Arts and Sciences, 800 B.C. to 1950* (21) ranks the contribution of 3,869 people to different fields of arts and science. Each listed person is ranked on a scale of 1 to 100 for his or her contribution to one or more of the following fields: art, literature, music, philosophy, astronomy, biology, chemistry, earth sciences, mathematics, medicine, physics and technology. People who contributed to more than one field were ranked separately for each field. For example, Isaac Newton received the highest score of 100 for his contribution in physics, and a score of 88.93 for his contribution in mathematics. For each person, the *Human Accomplishment* tables contain his or her name, ranking in all relevant fields, year of birth, year of death, year flourished, country of birth and country of work.

To find the number of famous people for each language, we converted countries of birth to languages as explained in **Section S5.2**. In most cases, we used the countries of birth as listed on *Human Accomplishment*. However, the dataset occasionally provided a geographical or cultural region, rather than a country, as a place of birth: *Balkans*, *Latin America*, *Sub-Saharan Africa*, *Arab World*, *Ancient Greece* and *Rome*. We replaced the first three with the specific places of birth for the respective people, as listed on *Wikipedia 26*, and converted them to languages based on their present-day countries. We did not resolve *Arab World*, *Ancient Greece* or *Rome* to specific locations, but instead converted them directly to *Arabic*, *Ancient Greek*, or *Latin*, respectively. As with the *Wikipedia 26* dataset, we increased the accuracy of the country-to-language mapping by selecting only the 1,655 people born between 1800 and 1950. Doing so also removed native speakers of Latin and Ancient Greek.

The following tables show the number of famous people in the *Human Accomplishment* dataset for each country (Table S9) and language (Table S10).

| Country                  | People (all years) | People (1800-1950) | Country                  | People (all years) | People (1800-1950) |
|--------------------------|--------------------|--------------------|--------------------------|--------------------|--------------------|
| 1 <i>Ancient Greece</i>  | 134                | N/A                | 25 <b>Japan</b>          | 169                | 57                 |
| 2 <i>Arab World</i>      | 86                 | 14                 | 26 <b>Kenya</b>          | 1                  | 1                  |
| 3 <b>Argentina</b>       | 2                  | 2                  | 27 <b>Mexico</b>         | 5                  | 4                  |
| 4 <b>Australia</b>       | 4                  | 4                  | 28 <b>Montenegro</b>     | 1                  | 1                  |
| 5 <b>Austria</b>         | 75                 | 48                 | 29 <b>Netherlands</b>    | 84                 | 31                 |
| 6 <b>Belgium</b>         | 82                 | 27                 | 30 <b>New Zealand</b>    | 3                  | 3                  |
| 7 <b>Brazil</b>          | 3                  | 3                  | 31 <b>Nicaragua</b>      | 1                  | 1                  |
| 8 <b>Bulgaria</b>        | 1                  | 1                  | 32 <b>Norway</b>         | 23                 | 22                 |
| 9 <b>Canada</b>          | 11                 | 11                 | 33 <b>Peru</b>           | 1                  | 1                  |
| 10 <b>Chile</b>          | 3                  | 3                  | 34 <b>Poland</b>         | 25                 | 21                 |
| 11 <b>China</b>          | 237                | 22                 | 35 <b>Portugal</b>       | 11                 | 4                  |
| 12 <b>Croatia</b>        | 5                  | 3                  | 36 <b>Romania</b>        | 5                  | 4                  |
| 13 <b>Cuba</b>           | 3                  | 3                  | 37 <b>Rome</b>           | 55                 | N/A                |
| 14 <b>Czech Republic</b> | 48                 | 28                 | 38 <b>Russia</b>         | 134                | 118                |
| 15 <b>Denmark</b>        | 37                 | 20                 | 39 <b>Serbia</b>         | 2                  | 2                  |
| 16 <b>Finland</b>        | 6                  | 5                  | 40 <b>Slovakia</b>       | 4                  | 4                  |
| 17 <b>France</b>         | 542                | 236                | 41 <b>Slovenia</b>       | 2                  | 2                  |
| 18 <b>Germany</b>        | 536                | 267                | 42 <b>South Africa</b>   | 1                  | 1                  |
| 19 <b>Greece</b>         | 9                  | 6                  | 43 <b>Spain</b>          | 76                 | 26                 |
| 20 <b>Guatemala</b>      | 1                  | 1                  | 44 <b>Sweden</b>         | 44                 | 21                 |
| 21 <b>Hungary</b>        | 21                 | 18                 | 45 <b>Switzerland</b>    | 64                 | 32                 |
| 22 <b>Iceland</b>        | 2                  | 1                  | 46 <b>United Kingdom</b> | 531                | 230                |
| 23 <b>India</b>          | 93                 | 16                 | 47 <b>United States</b>  | 297                | 272                |
| 24 <b>Italy</b>          | 389                | 58                 | <b>Total</b>             | <b>3869</b>        | <b>1655</b>        |

**Table S9** Number of people listed on human accomplishment, by *country*.

| Language                  | Code | People (all years) | People (1800-1950) | Language                 | Code | People (all years) | People (1800-1950) |
|---------------------------|------|--------------------|--------------------|--------------------------|------|--------------------|--------------------|
| 1 <b>Afrikaans</b>        | afr  | 0.13               | 0.13               | 23 <b>Japanese</b>       | jpn  | 169                | 57                 |
| 2 <b>Albanian</b>         | sqi  | 0.88               | 0.47               | 24 <b>Latin</b>          | lat  | 55                 |                    |
| 3 <b>Arabic</b>           | ara  | 86.05              | 14.05              | 25 <b>Malayalam</b>      | mal  | 2.98               | 0.51               |
| 4 <b>Basque</b>           | eus  | 1.52               | 0.52               | 26 <b>Maori</b>          | mri  | 0.12               | 0.12               |
| 5 <b>Bengali</b>          | ben  | 7.53               | 1.3                | 27 <b>Marathi</b>        | mar  | 6.51               | 1.12               |
| 6 <b>Bulgarian</b>        | bul  | 0.77               | 0.77               | 28 <b>Norwegian</b>      | nor  | 23                 | 22                 |
| 7 <b>Catalan</b>          | cat  | 12.92              | 4.42               | 29 <b>Polish</b>         | pol  | 24.45              | 20.54              |
| 8 <b>Chinese</b>          | zho  | 237.16             | 22.16              | 30 <b>Portuguese</b>     | por  | 14.77              | 7.38               |
| 9 <b>Czech</b>            | ces  | 45.79              | 26.71              | 31 <b>Romanian</b>       | ron  | 4.55               | 3.64               |
| 10 <b>Danish</b>          | dan  | 37                 | 20                 | 32 <b>Russian</b>        | rus  | 134                | 118                |
| 11 <b>Dutch</b>           | nld  | 133.2              | 47.2               | 33 <b>Serbo-Croatian</b> | hbs  | 11.61              | 8.11               |
| 12 <b>English</b>         | eng  | 788.1              | 466.26             | 34 <b>Slovak</b>         | slk  | 4.12               | 3.8                |
| 13 <b>Finnish</b>         | fin  | 5.47               | 4.56               | 35 <b>Slovenian</b>      | slv  | 1.82               | 1.82               |
| 14 <b>French</b>          | fra  | 590.27             | 255.74             | 36 <b>Spanish</b>        | spa  | 104.02             | 63.01              |
| 15 <b>Galician</b>        | glg  | 5.32               | 1.82               | 37 <b>Swahili</b>        | swa  | 0.8                | 0.8                |
| 16 <b>German</b>          | deu  | 643.22             | 329.91             | 38 <b>Swedish</b>        | swe  | 44.33              | 21.27              |
| 17 <b>Greek (Ancient)</b> | grc  | 134                |                    | 39 <b>Tamil</b>          | tam  | 5.49               | 0.94               |
| 18 <b>Greek (Modern)</b>  | ell  | 8.96               | 5.99               | 40 <b>Turkish</b>        | tur  | 1.81               | 1.19               |
| 19 <b>Hindi</b>           | hin  | 38.16              | 6.59               | 41 <b>Ukrainian</b>      | ukr  | 0.04               | 0.04               |
| 20 <b>Hungarian</b>       | hun  | 20.5               | 17.62              | 42 <b>Urdu</b>           | urd  | 4.65               | 0.8                |
| 21 <b>Icelandic</b>       | isl  | 2                  | 1                  | 43 <b>Vietnamese</b>     | vie  | 0.04               | 0.04               |
| 22 <b>Italian</b>         | ita  | 393.22             | 60.14              |                          |      |                    |                    |

**Table S10** Number of people listed on human accomplishment, by *language*.

#### ***S5.4 Comparison of the famous people datasets***

The two datasets we use—*Wikipedia 26* and *Human Accomplishment*—were compiled in different ways. Wikipedia is written by a large number of volunteers with different backgrounds from all over the world, while Human Accomplishment is the work of a single author, the American political scientist Charles Murray. Naturally, both sources exhibit certain biases despite the efforts taken by their authors.

To understand these biases, we compared the cultural significance attributed by each dataset to the listed individuals. We define the cultural significance of a person as the number of languages in which his/her Wikipedia biography is available (for entries on Wikipedia 26), or the score that Murray gave this individual (*Human Accomplishment* entries are given a score from 1 to 100 based on their contribution in their respective field or fields). Figure S4 shows the correlation between these two measurements. One notable observation is that the cultural contribution the Charles Murray attributes to people born in Asia (measured by their score on his list) is higher than their cultural contribution according to *Wikipedia 26* (measured by the number of languages in which a Wikipedia biography is available). Murray is also less likely than Wikipedia to acknowledge the contribution of left-wing liberals.

The moderate correlation ( $R^2=0.25$ ) shows that using these two lists of famous individuals provides a more balanced perspective than the exclusive use of Wikipedia. While the two datasets are substantially different, there is a consistent correlation between the number of famous people in a language according to either dataset and the centrality of that language, attesting to the robustness of our method.



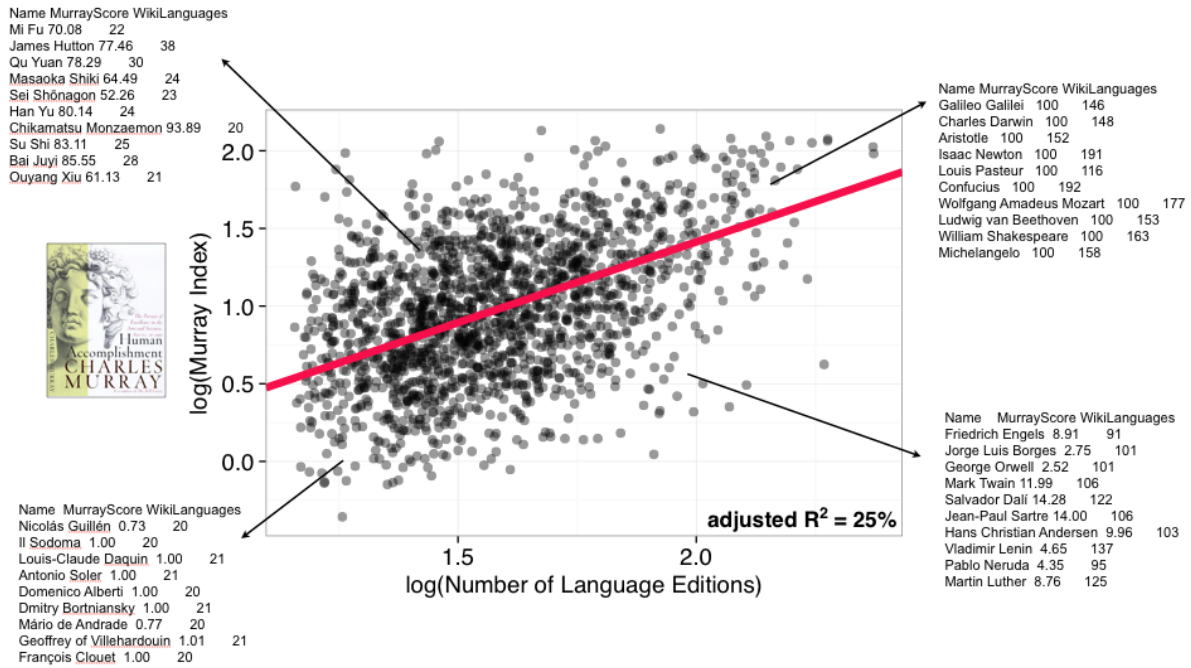

**Figure S4** Correlation of the *Wikipedia 26* and *Human Accomplishment* datasets

## References for the SI Appendix

1. Rodriguez S (2012) Another Milestone for Twitter: 200 Million Monthly Active Users. *Los Angel Times*. Available at: <http://www.latimes.com/business/technology/la-fi-tn-twitter-200-million-monthly-active-users-20121219,0,3316419.story> [Accessed March 12, 2013].
2. Boyd D, Crawford K (2011) Six Provocations for Big Data. *SSRN ELibrary*. Available at: [http://papers.ssrn.com/sol3/papers.cfm?abstract\\_id=1926431](http://papers.ssrn.com/sol3/papers.cfm?abstract_id=1926431) [Accessed November 1, 2012].
3. Pew Internet & American Life Project (2013) *Twitter Reaction to Events Often at Odds with Overall Public Opinion* (Pew Internet & American Life Project) Available at: <http://www.pewresearch.org/2013/03/04/twitter-reaction-to-events-often-at-odds-with-overall-public-opinion/> [Accessed March 6, 2013].
4. McCandless M (2011) *Chromium Compact Language Detector* Available at: <http://code.google.com/p/chromium-compact-language-detector/>.
5. Mocanu D, et al. (2013) The Twitter of Babel: Mapping World Languages through Microblogging Platforms. *PLoS ONE* 8(4):e61981.
6. Graham M, Hale SA, Gaffney D (2013) Where in the world are you? Geolocation and language identification in Twitter. *Prof Geogr*.
7. Herring SC, et al. (2007) in *System Sciences, 2007. HICSS 2007. 40th Annual Hawaii International Conference on* Available at: [http://ieeexplore.ieee.org/xpls/abs\\_all.jsp?arnumber=4076532](http://ieeexplore.ieee.org/xpls/abs_all.jsp?arnumber=4076532) [Accessed December 13, 2012].
8. International Information Centre for Terminology (2002) ISO 639-1 Registration Authority. Available at: [http://www.infoterm.info/standardization/iso\\_639\\_1\\_2002.php](http://www.infoterm.info/standardization/iso_639_1_2002.php).
9. SIL International (2007) ISO 639-3 Registration Authority. Available at: <http://www.sil.org/iso639-3> [Accessed June 14, 2012].
10. Erard M (2012) *Babel No More: The Search for the World's Most Extraordinary Language Learners* (Free Press, New York).
11. Meta-Wiki List of Wikipedias. Available at: [http://meta.wikimedia.org/wiki/List\\_of\\_Wikipedias](http://meta.wikimedia.org/wiki/List_of_Wikipedias) [Accessed March 10, 2013].
12. UNESCO Index Translationum: World Bibliography of Translation. Available at: <http://www.unesco.org/xtrans/bsform.aspx> [Accessed July 22, 2012].
13. UNESCO Contributions from Countries. *Index Transl*. Available at: <http://www.unesco.org/xtrans/bscontrib.aspx> [Accessed September 1, 2012].

14. Ruhlen M (1991) *A Guide to the World's Languages: Classification* (Stanford University Press).
15. Lewis MP (2009) *Ethnologue: Languages of the World* (SIL international, Dallas, TX). 16th Ed. Available at: <http://www.ethnologue.com/16> [Accessed November 13, 2012].
16. Library of Congress (2008) ISO 639-5 Registration Authority. Available at: <http://www.loc.gov/standards/iso639-5>.
17. Zachte E (2012) Wikipedia Statistics. *Wikimedia Stat*. Available at: <http://stats.wikimedia.org/EN/Sitemap.htm> [Accessed June 14, 2012].
18. International Monetary Fund (2012) *World Economic Outlook Database, April 2012* Available at: <http://www.imf.org/external/pubs/ft/weo/2012/01/weodata/index.aspx> [Accessed July 17, 2012].
19. Central Intelligence Agency (2011) *The World Factbook* (Central Intelligence Agency, Washington, DC).
20. Bonacich P (1987) Power and Centrality: A Family of Measures. *Am J Sociol* 92(5):1170–1182.
21. Murray CA (2003) *Human Accomplishment: The Pursuit of Excellence in the Arts and Sciences, 800 B.C. to 1950* (HarperCollins, New York).
22. Graham M (2011) in *Critical Point of View: A Wikipedia Reader*, eds Lovink GW, Tkacz N, pp 269–282.
23. Hecht B, Gergle D (2009) in *Proceedings of the fourth international conference on Communities and technologies, C&T '09*. (ACM, New York, NY, USA), pp 11–20. Available at: <http://doi.acm.org/10.1145/1556460.1556463> [Accessed November 5, 2012].
24. Freebase (2012) person.tsv. Available at: <http://download.freebase.com/datadumps/latest/browse/people/person.tsv> [Accessed November 9, 2012].
25. Freebase Wiki Freebase API. Available at: [http://wiki.freebase.com/wiki/Freebase\\_API](http://wiki.freebase.com/wiki/Freebase_API) [Accessed March 10, 2013].
26. Wikimedia MediaWiki API. Available at: <https://www.mediawiki.org/wiki/API>.
27. Google The Google Geocoding API v3. Available at: <https://developers.google.com/maps/documentation/geocoding/>.
